# Supplementary material for: Calcium supplementation and the risk of type 2 diabetes
Source: Royal Society of Chemistry journal article supplement (doi:10.1039/d5fo00499c), 2025-01-01

**Supplementary Figure 1. Participants inclusion flowchart.** DEMO: Number of reports received (number of patients); DRUG: Number of patient medication records included in the analysis; PS: The primary suspect; REAC: Number of patient adverse events recorded in the analysis.

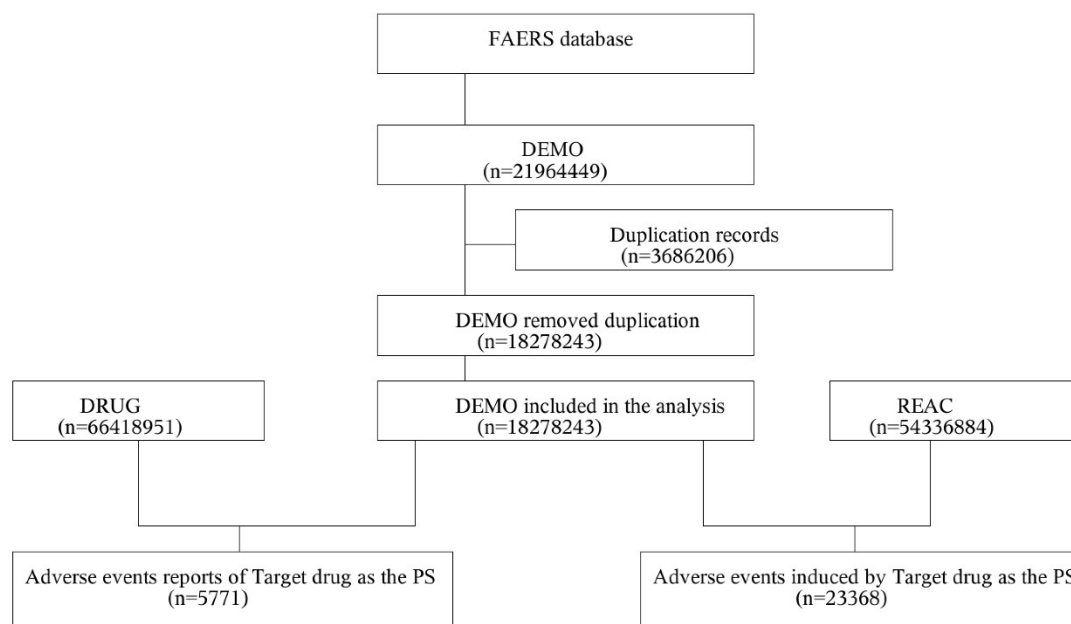

**Supplementary Figure 2. Leave-one-out sensitivity analysis for calcium on type 2 diabetes.** MR: Mendelian randomization; T2D: type 2 diabetes.

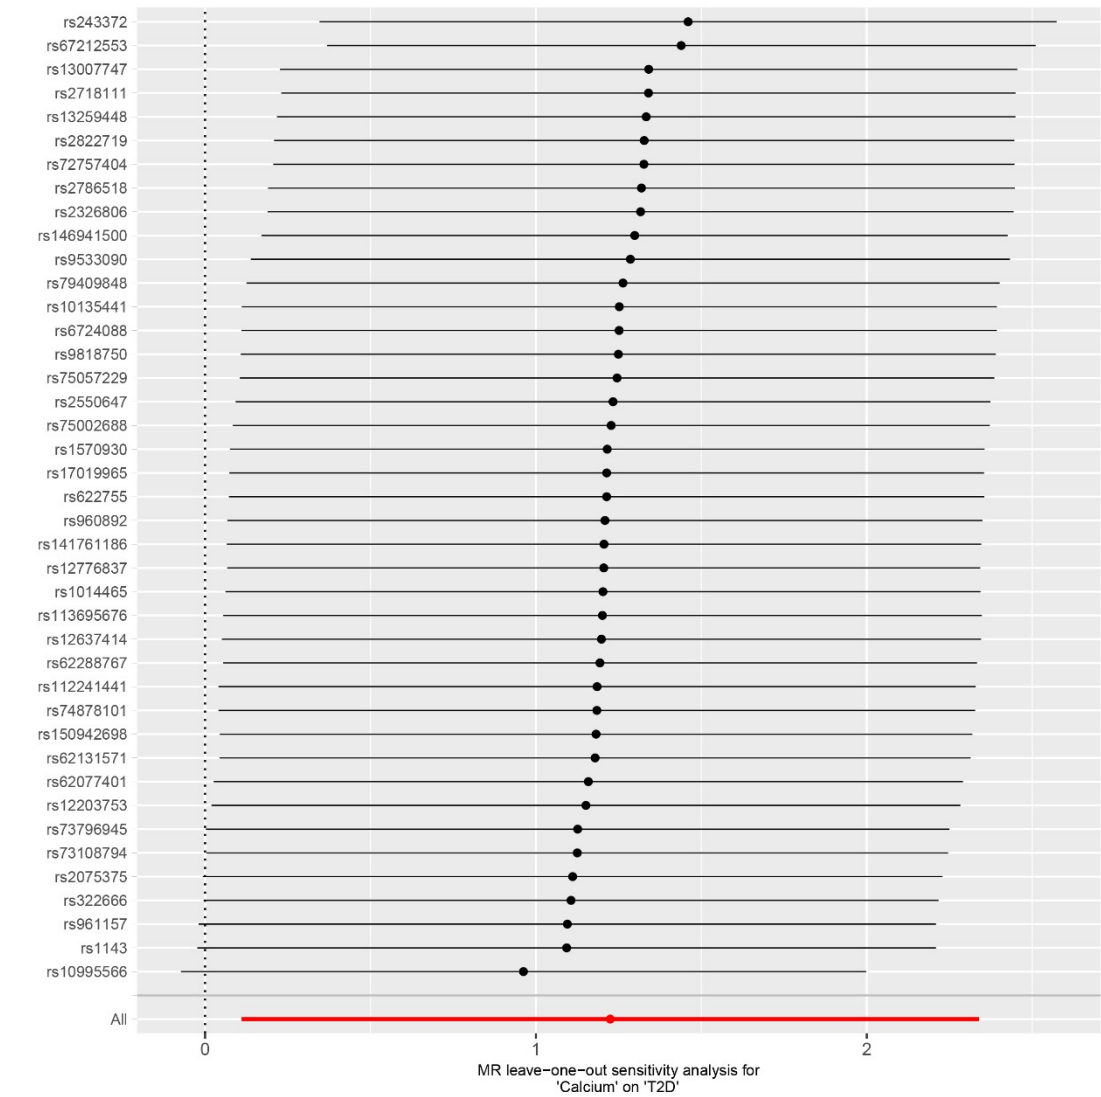

Supplement: d5fo00499c1.pdf [file d5fo00499c1.pdf]
