# Supplementary material for: Calcium supplementation and the risk of type 2 diabetes
Source: Royal Society of Chemistry journal article supplement (doi:10.1039/d5fo00499c), 2025-01-01
Supplement: d5fo00499c2.xlsx [file d5fo00499c2.xlsx]

## Sheet: Supplementary Table 1
Supplementary Table 1. T2D case and control ascertainment criteria for GWAS (European ancestry).
AFR: African. EAS: East Asian. EUR: European. HIS: Hispanic. SAS: South Asian.
Study acronym	Study name	PMID	Case ascertainment	Control ascertainment	Ancestry group(s)
BIOME	BioMe Biobank	21573225	Random glucose ≥200mg/dl ever, physician-entered diagnosis (at least two occurrences on two separate days) ever, or T2D medication (at least two occurrences on two separate days) ever.	Not having T2D and all glucose <100mg/dl (if any).	AFR, EUR, HIS
DECODE	deCODE Genetics	24464100	Diagnostic fasting glucose or HbA1c levels, hospital discharge diagnosis, use of oral diabetes medication or self-report.	Not fulfilling case criteria.	EUR
DGDG	Diabetes Gene Discovery Group	N/A	Hospital diagnosis based on HbA1c and fasting glucose.	No self-reported use of medication to treat diabetes and fasting or non-fasting glucose <7.0mmol/l.	EUR
DGI	Diabetes Genetics Initiative	17463246	WHO (1999) criteria with fasting plasma glucose ≥7.0mmol/l or a 2-hour glucose ≥11.1mmol/l during an oral glucose tolerance test; age at onset >35 years and no detectable GAD Ab; no family history of MODY mutation carriers.	Normal glucose tolerance, with fasting plasma glucose <6.1mmol/l, 2-hour glucose <7.8mmol/l no first-degree relatives with T2D.	EUR
EGCUT	Estonian Genome Center of the University of Tartu	24518929	Previous T2D diagnosis.	Fasting glucose <7mmol/l.	EUR
EPIC-INTERACT	European Prospective Investigation into Cancer and Nutrition	21717116	Incident T2D based on: self-report (self-reported T2D, doctor diagnosed T2D, diabetes drug use); linkage to primary care registers; secondary care registers, medication use (drug registers); hospital admissions; mortality data; local and national diabetes and pharmaceutical registers (Denmark and Sweden).	Free of diabetes.	EUR
FHS	Framingham Heart Study	14819398	On T2D treatment or fasting glucose ≥7mmol/l (when available) or 2-hour glucose ≥11.1mmol/l.	Not on T2D medication, fasting glucose <7mmol/l, 2-hour glucose <11.1mmol/l, and HbA1c ≤6.5.	EUR
FUSION	Finland-United States Investigation of NIDDM Genetics	17463248	WHO 1999 criteria of fasting glucose ≥7.0mmol/l or 2-hour plasma glucose ≥11.1mmol/l or reported diabetes medication use or based on medical record review; no known or probable T1D among first degree relatives; excluded if insulin treatment initiated within 10 years of disease diagnosis, detectable levels of anti-GAD antibodies and fasting C-peptide ≤0.30nmol/l; excluded if insulin treatment init…	Normal glucose tolerance as defined by WHO 1999 criteria.	EUR
GCKD	German Chronic Kidney Disease	21862458	Anti-diabetic medication (ATC code A10*) or HbA1c ≥6.5%.	Not fulfilling case criteria.	EUR
GENOA	Genetic Epidemiology Network of Arteriosclerosis	15121494	Use of T2D medications or fasting glucose ≥7.0mmol/l.	No self-reported T2D, not taking T2D medications, and fasting glucose <6.1mmol/l.	AFR, EUR
GERA	Resource for Genetic Epidemiology on Adult Health and Aging	27189021	ICD9 codes.	Not fulfilling case criteria.	AFR, EUR
GODARTS	Genetics of Diabetes and Audit Research in Tayside Scotland	9329309	Electronic medical records.	Population-based (no ascertainment).	EUR
GOMAP-TEENAGE	Genetic Overlap between Metabolic and Psychiatric traits & TEENs of Attica: Genes and Environment	29125842, 23399026	Previous diagnosis of T2D with or without psychiatric disease.	Adolescent students from Athens, Greece (prospective cohort study).	EUR
HPFS	Health Professionals’ Follow-Up Study	20418489	Self-reported diabetes confirmed by a validated supplementary questionnaire (National Diabetes Data Group criteria before 1998; American Diabetes Association diagnostic criteria from 1998 onwards).	Free of diabetes (until 2006).	EUR
KORA	Collaborative Health Research in the Region of Augsburg	16032513	Self-reported.	No self-reported use of medication to treat diabetes and fasting glucose <7.0mmol/l.	EUR
MESA	Multi-Ethnic Study of Atherosclerosis	12397006	Known T2D or fasting whole-blood glucose ≥7mmol/l.	No self-reported use of medication to treat diabetes and fasting glucose <7.0mmol/l.	AFR, EAS, EUR, HIS
METSIM	Metabolic Syndrome in Men	28119442	WHO 1999 criteria of fasting glucose ≥7.0mmol/l or 2-hour plasma glucose ≥11.1mmol/l or reported diabetes medication use or based on medical record review; no known or probable T1D among first degree relatives; excluded if insulin treatment initiated within 10 years of disease diagnosis, detectable levels of anti-GAD antibodies and fasting C-peptide ≤0.30nmol/l; excluded if insulin treatment init…	Normal glucose tolerance as defined by WHO 1999 criteria.	EUR
MGB	Mass General Brigham Biobank	26784234	Curated disease algorithm PPV >99% and age of at least 30.	Curated disease algorithm NPV >99%, age of at least 55 and HbA1c <5.7.	EUR
MGI	Michigan Genomics Initiative	N/A	EHR-derived ICD-9 codes: 250.00, 250.02, 250.20, 250.22, 250.30, 250.32, 250.80, 250.82, 250.90, 250.92.	EHR-derived ICD-9 exclude range 249-250.99.	EUR
NEO	Netherlands Epidemiology of Obesity	23576214	Fasting glucose ≥7.0mmol/l, or physician-diagnosed diabetes, or on diabetes treatment.	Fasting glucose <7.0mmol/l, and no treatment of diabetes.	EUR
NHS	Nurses’ Health Study	20418489	Self-reported diabetes confirmed by a validated supplementary questionnaire (National Diabetes Data Group criteria before 1998; American Diabetes Association diagnostic criteria from 1998 onwards).	Free of diabetes (until 2006).	EUR
NUGENE	Northwestern University Genetics	21269473	ICD9 codes (excluding those with ketoacidosis codes), excluding individuals treated only with insulin and have never been on a T2D medication; or individuals with HbA1c ≥6.5, fasting glucose >125mg/dl, or random glucose >200mg/dl, and prescribed T2D medication.	At least two clinic visits with no ICD-9 code for T2D, T1D or diabetes-related condition, and no prescribed treatment for diabetes, no reported blood glucose ≥110mg/dl from at least one glucose measurement, and no reported HbA1c ≥6.0, and no family history of diabetes.	EUR
PIVUS	Prospective Investigation of the Vasculature in Uppsala Seniors	16141402	Known T2D or fasting whole blood glucose >6.1mmol/l.	Free of diabetes.	EUR
PROSPER	PROspective Study of Pravastatin in the Elderly at Risk	12457784	Known diabetes mellitus or fasting blood glucose >7mmol/l.	Free of prevalent or incident diabetes.	EUR
RS	Rotterdam Study	4690838, 4690839, 4690840	WHO guidelines: fasting blood glucose >7.0 mmol/l or use of blood-glucose-lowering medication (derived from both structured home interviews and linkage to pharmacy records).	Free of diabetes.	EUR
UCPH	Danish T2D case-control study	23160641	Self-report, anti-diabetic treatment, fasting plasma glucose >7.0mmol/l or 2-hr plasma glucose >11.1mmol/l.	Fasting plasma glucose <6.1mmol/l and, if measured, 2-hr plasma glucose <7.8mmol/l.	EUR
UKBB	UK Biobank	25826379	Self-reported medical history and relevant medication.	Free of diabetes.	EUR, SAS
ULSAM	Uppsala Longitudinal Study of Adult Men	16030278	Hospital discharge register-defined diabetes before 2002.	Free of diabetes.	EUR
WTCCC	Wellcome Trust Case Control Consortium	17463249	Prescribed treatment with sulphonylureas, biguanides, other oral agents and/or insulin, or in the case of individuals treated with diet alone, historical or contemporary laboratory evidence of hyperglycemia.	Population-based (no ascertainment).	EUR

## Sheet: Supplementary Table 2
Supplementary Table 2. MR analysis of causal effects of calcium on T2D.
b (se): MR estimate standard error; Egger_intercept: intercept of MR-Egger intercept analysis; I2: I2 statistics of heterogeneity; IVW: inverse variance weighted; N_IV: number of instrumental variables; P_pleiotropy: P value of MR-Egger intercept analysis; Q: statistics of heterogeneity analysis; Q_P: Cochran’s P value of heterogeneity analysis; T2D: type 2 diabetes; WM: weighted median.
Exposure	Outcome	Method	b (se)	OR [95%CI]	N_IV	P_IV	Q	Q_P	I2	Egger_intercept	P_pleiotropy	P
Calcium	T2D	IVW	1.225 (0.569)	3.40 [1.12-10.38]	41	1e-05	80.88	0.000139	0.505	NA	NA	0.031
Calcium	T2D	WM	1.698 (0.643)	5.46 [1.55-19.28]	41	1e-05	NA	NA	NA	NA	NA	0.00831
Calcium	T2D	MR-Egger	1.405 (1.466)	4.08 [0.23-72.17]	41	1e-05	80.84	9.47e-05	0.505	-0.001	0.894	0.344

## Sheet: Supplementary Table 3
Supplementary Table 3. F statistic for instrumental variables.
SNP: single-nucleotide polymorphisms; T2D: type 2 diabetes.
Exposure	Outcome	SNP	effect_allele	other_allele	F
Calcium	T2D	rs10135441	G	T	1.86
Calcium	T2D	rs1014465	G	C	1.34
Calcium	T2D	rs10995566	C	T	1.71
Calcium	T2D	rs112241441	C	T	2.07
Calcium	T2D	rs113695676	G	C	1.64
Calcium	T2D	rs1143	C	T	1.59
Calcium	T2D	rs12203753	C	T	1.31
Calcium	T2D	rs12637414	A	G	2.11
Calcium	T2D	rs12776837	A	G	1.25
Calcium	T2D	rs13007747	T	C	1.29
Calcium	T2D	rs13259448	T	C	1.23
Calcium	T2D	rs1383264	A	T	1.44
Calcium	T2D	rs141761186	C	T	1.28
Calcium	T2D	rs146941500	C	A	1.31
Calcium	T2D	rs150942698	T	C	1.44
Calcium	T2D	rs1570930	C	T	1.26
Calcium	T2D	rs17019965	C	G	1.24
Calcium	T2D	rs2075375	C	T	1.38
Calcium	T2D	rs2209008	G	C	1.32
Calcium	T2D	rs2326806	T	G	1.43
Calcium	T2D	rs243372	G	A	3.09
Calcium	T2D	rs2550647	C	T	1.26
Calcium	T2D	rs2718111	T	C	1.24
Calcium	T2D	rs2786518	G	C	1.54
Calcium	T2D	rs2822719	G	C	1.23
Calcium	T2D	rs322666	C	G	1.29
Calcium	T2D	rs62077401	T	G	1.27
Calcium	T2D	rs62131571	G	A	1.25
Calcium	T2D	rs622755	A	G	1.34
Calcium	T2D	rs62288767	A	C	1.47
Calcium	T2D	rs67212553	T	C	1.54
Calcium	T2D	rs6724088	C	T	1.42
Calcium	T2D	rs72757404	T	C	1.33
Calcium	T2D	rs73108794	C	T	1.37
Calcium	T2D	rs73796945	G	A	1.37
Calcium	T2D	rs74878101	C	T	1.41
Calcium	T2D	rs75002688	T	G	1.67
Calcium	T2D	rs75057229	G	C	1.42
Calcium	T2D	rs79409848	G	T	1.55
Calcium	T2D	rs9533090	C	T	2.28
Calcium	T2D	rs960892	G	A	1.33
Calcium	T2D	rs961157	A	G	1.48
Calcium	T2D	rs9818750	A	G	1.33
